# Supplementary material
Source: publisher figshare collection journal article supplement (https://karger.figshare.com/ndownloader/files/12525743)
Supplement: Supplementary file 1 [file 12525743]

## Sheet: Sheet1
Supplementary Table 1D: Gonads
	Testosterone	Medroxyprogesterone	17b Estradiol/ Ethinylestradiol/ Conjugated Estrogens	GnRH analogues	Oral Contraceptives (Estroprogesterones)	Depot Progestin
Angola	No	No	No	No	No	No
Benin	No	No	Yes	No	Yes	Yes
Botswana	Yes	Yes	Yes	No	Yes	Yes
Burkina Faso	No	No	Yes	No	Yes	Yes
Burundi	Yes	No	Yes	No	Yes	No
Cameroon	Yes	No	No	No	Yes	Yes
Cape Verde	Yes	Yes	Yes	No	Yes	Yes
Central African Republic	Yes	No	No	No	Yes	Yes
Chad	No	No	Yes	No	Yes	Yes
Congo	Yes	No	No	No	Yes	Yes
Cote Ivoire	No	No	Yes	No	Yes	Yes
Democratic Republic of Congo	No	No	Yes	No	Yes	Yes
Eritrea	Yes	Yes	Yes	No	Yes	Yes
Ethiopia	No	No	No	No	Yes	Yes
Gabon	No	No	Yes	No	Yes	Yes
Gambia	No	No	No	No	Yes	Yes
Ghana	No	Yes	Yes	Yes	Yes	Yes
Guinea	No	No	Yes	No	Yes	Yes
Guinea-Bissau	Yes	No	Yes	No	Yes	Yes
Kenya	No	No	No	No	Yes	Yes
Lesotho	No	No	No	No	No	No
Liberia	Yes	No	Yes	No	Yes	Yes
Madagascar	Yes	No	Yes	No	Yes	Yes
Malawi	No	No	Yes	No	Yes	Yes
Mali	Yes	Yes	Yes	No	Yes	Yes
Mauritania	No	No	No	No	Yes	No
Mozambique	No	Yes	No	Yes	Yes	Yes
Namibia	No	Yes	Yes	No	Yes	Yes
Niger	No	No	No	No	Yes	Yes
Nigeria	Yes	No	Yes	No	Yes	Yes
Rwanda	Yes	Yes	Yes	No	Yes	Yes
Senegal	No	No	No	No	Yes	Yes
Seychelles	No	No	Yes	No	Yes	No
Sierra Leone	No	No	No	No	Yes	Yes
South Africa	Yes	Yes	Yes	No	Yes	Yes
Southern Sudan	No	No	No	No	Yes	Yes
Swaziland	No	No	Yes	No	Yes	Yes
Tanzania	No	No	Yes	No	Yes	Yes
Togo	No	Yes	No	No	No	Yes
Uganda	Yes	No	No	No	Yes	Yes
Zambia	Yes	No	Yes	No	Yes	Yes
Zimbabwe	Yes	Yes	Yes	No	Yes	Yes
